# Supplementary material for: Antenatal Doppler ultrasound implementation in a rural sub-Saharan African setting: exploring the perspectives of women and healthcare providers
Source: Springer Nature journal article supplement (doi:10.1186/s12978-021-01233-5), 2021-10-07
Supplement: MOESM4 [file 12978_2021_1233_MOESM4_ESM.pdf]

**INTERVIEW GUIDE FOR HEALTHCARE MANAGERS**  
**(ENGLISH VERSION)**

**Study Title: Understanding Women's and Healthcare Workers' Experiences and Perceptions Regarding the Use of Doppler Ultrasound Examination for Pregnant Women in Western Uganda**

**Key Informants Interview Guide**

- Age of Key Informant
  - Job title/position held
  - Education level
  - Years in current position/district
  - Institution represented
  - Job responsibilities relating to Maternal and Child Health
- 1) What does your role in maternal and child health involve?
  - 2) Describe the projects related to maternal and child health being run in your district
  - 3) What are your thoughts about the idea of using Doppler ultrasound scan for pregnant women to identify mothers who may be vulnerable to stillbirth and streamline a path for early intervention in the shortest time possible?
    - Probe for reasons for their views
    - What additional information could you have regarding the use of ultrasounds scan and follow-up of pregnant mothers?
  - 4) In your opinions what are the potential appeals and benefits of ultrasound scan for pregnant women?
    - What aspects are less appealing about the scan?
    - Explain the concerns that you may have about ultrasound scan and why?
    - One of the concerns is that ultrasound scan affects the health of the mother and baby? Any thoughts?
  - 5) In your opinion what are some of the potential barriers and challenges to:
    - Acceptance of Doppler ultrasound scan
    - Completion of ANC visits
    - Delivery at the hospital
    - Probe for reasons for their views
  - 6) From your perspective, what role could ultrasound play in addressing some of these health challenges? (Probe for how and why)
  - 7) What would you recommend as the next steps for improving the EPID project for pregnant women?
  - 8) Is there anything that you would like to tell me that I have not asked?

**Thank you for your time!**
